# Supplementary material
Source: PubMed Central journal article supplement (PMC3680600)
Supplement: NIHMS467010-supplement-1_si_001.pdf [file NIHMS467010-supplement-1_si_001.pdf]

# **Comprehensive Experimental and Computational Analysis of Binding Energy Hot Spots at the NF- $\kappa$ B Essential Modulator/IKK $\beta$ Protein-Protein Interface**

Mary S. Golden<sup>1</sup>, Shaun M. Cote<sup>1</sup>, Marianna Sayeg<sup>2</sup>, Brandon S. Zerbe<sup>2</sup>, Elizabeth A. Villar<sup>1</sup>, Dmitri Beglov<sup>2</sup>, Stephen L. Sazinsky<sup>1</sup>, Rosina M. Georgiadis<sup>1</sup>, Sandor Vajda<sup>1,2\*</sup>, Dima Kozakov<sup>2\*</sup>, and Adrian Whitty<sup>1\*</sup>

Departments of Chemistry<sup>1</sup> and Biomedical Engineering<sup>2</sup>, Boston University, 590 Commonwealth Avenue, Boston, Massachusetts 02215, United States

**A**

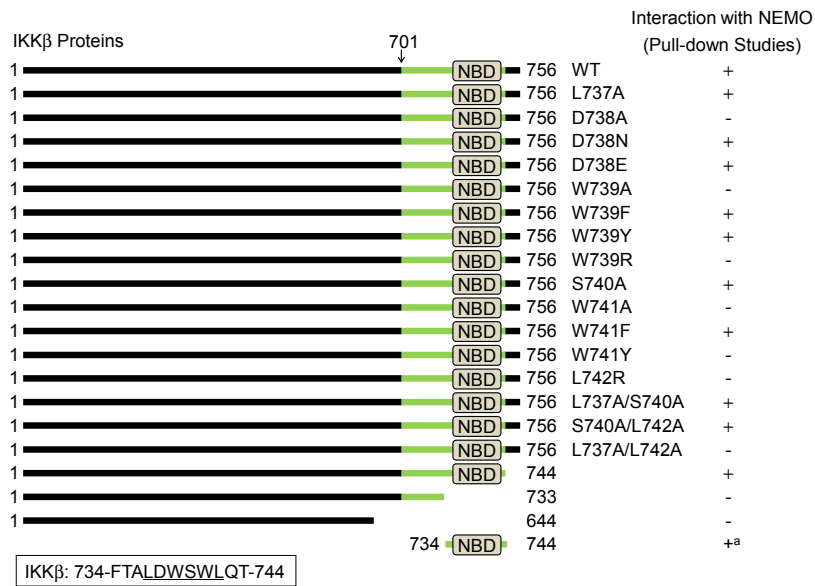

**B**

| IKK Proteins        | IC <sub>50</sub> or K <sub>D</sub> (μM)                                                      |
|---------------------|----------------------------------------------------------------------------------------------|
| 680-756 β-77 mer    | 0.0034 <sup>a</sup> , 1 <sup>b</sup>                                                         |
| 701-745 β-45mer     | 0.047 <sup>c</sup> , (0.015 - 0.030) <sup>d</sup> , 0.0762 <sup>e</sup> , 0.015 <sup>f</sup> |
| 701-745 β-45mer Mut | >1 <sup>d</sup>                                                                              |
| 701-745 α/β-45 mer  | 0.036 <sup>c</sup>                                                                           |
| 718-745 α/β-28 mer  | 7 <sup>g</sup>                                                                               |
| 727-745 α/β-19 mer  | 20 <sup>g</sup>                                                                              |
| 735-745 α-11 mer    | 39 <sup>g</sup>                                                                              |
| 735-745 β-11 mer    | 3600 <sup>a</sup> , 35 <sup>b</sup> , >10 <sup>d</sup> , >100 <sup>e</sup>                   |
| 735-745 β-Peptide   | 20 <sup>h</sup>                                                                              |

β-45mer: PAKKSEELVAEAHNLC~~T~~LL~~E~~NAIQD~~T~~VRE~~Q~~D~~Q~~SFTALDWSWLQTE  
 β-45mer Mut: PAKKSEELVAEAHNLC~~T~~LL~~E~~NAIQD~~T~~VRE~~Q~~D~~Q~~SFTALDASALQTE  
 α/β-45mer: PAKKSEELVAEAHNLC~~T~~LL~~E~~NAIQD~~T~~VRE~~Q~~GNSMMNLDWSWLTE-  
 α/β-28 mer: TVRE~~Q~~GNSMMNLDWSWLTE-  
 α/β-19 mer: TLL~~E~~NAIQD~~T~~VRE~~Q~~GNSMMNLDWSWLTE-  
 α-11 mer: MMNLDWSWLTE-  
 β-11 mer: TALDWSWLQTE  
 β-Peptide: Propionyl-TALDWSWLQTE-OH

**Figure S1.** Literature data on NEMO binding properties of IKK $\beta$  point mutants and peptide fragments. (A) Pull-down studies with wild-type (WT) or IKK $\beta$  deletion and point mutations were performed with either full-length NEMO-FLAG or GST-NEMO.<sup>1</sup> <sup>a</sup>An 11-mer IKK $\beta$  peptide spanning the NBD dose-dependently blocked interaction of both IKK $\beta$  and IKK $\alpha$  with full-length GST-NEMO in pull-down studies, and also disrupted preformed NEMO/IKK interactions.<sup>2</sup> (B) Literature results of measured binding affinities for IKK truncation proteins. <sup>a</sup>Average  $K_D$  determined from SPR binding studies (Biacore) in which various concentrations of IKK $\beta$  were reacted with surface immobilized biotinylated NEMO (38-196).<sup>4</sup> <sup>b</sup> $K_D$  determined by isothermal titration calorimetry. IKK $\beta$  peptides were titrated into solutions containing His-tagged NEMO (38-196).<sup>4</sup> <sup>c</sup> $IC_{50}$  determined when competing for binding of a biotinylated IKK $\alpha/\beta$  hybrid 45-mer peptide to GST-NEMO (1-196) as determined from concentration dependent FRET studies.<sup>3</sup> <sup>d</sup> $IC_{50}$  determined when competing for binding of a TAMRA-IKK $\beta$  45-mer peptide to NEMO (2-200) as determined from fluorescence polarization studies.<sup>5</sup> <sup>e</sup> $K_D$  determined from SPR binding studies (Biacore) of IKK $\beta$  peptides and biotinylated NEMO (2-200).<sup>5</sup> <sup>f</sup>Average  $K_D$  determined when competing for binding of a FITC labeled IKK $\beta$  peptide to full length NEMO (residues 2-419) in concentration dependent fluorescence anisotropy studies.<sup>6</sup> <sup>g</sup> $IC_{50}$  determined when competing for binding of a biotinylated IKK $\alpha/\beta$  chimeric 44-mer peptide to GST-NEMO (2-200) as determined from concentration dependent FRET studies.<sup>5</sup> Authors also reported  $IC_{50}$  values measured by Alphascreen.<sup>5</sup> <sup>h</sup> $IC_{50}$  determined when competing for binding of a biotinylated IKK $\beta$  11-mer peptide to GST-NEMO (1-196) as determined from concentration dependent FRET studies.<sup>3</sup> <sup>i</sup> $IC_{50}$  determined when competing for binding of a 11-mer IKK $\beta$  peptide to His-NEMO-FLAG as determined from concentration dependent pull-down studies.<sup>7</sup> The identified six residue NEMO binding domain (NBD) conserved in IKK $\alpha$  and IKK $\beta$  is underlined in the provided sequences in (A) and (B). Regions shown in green in (A) and (B) indicate residues from either a 45-mer IKK $\beta$  peptide or IKK $\alpha/\beta$  hybrid peptide (701-745) which were both successfully crystallized with GST-NEMO (44-111).<sup>3</sup>

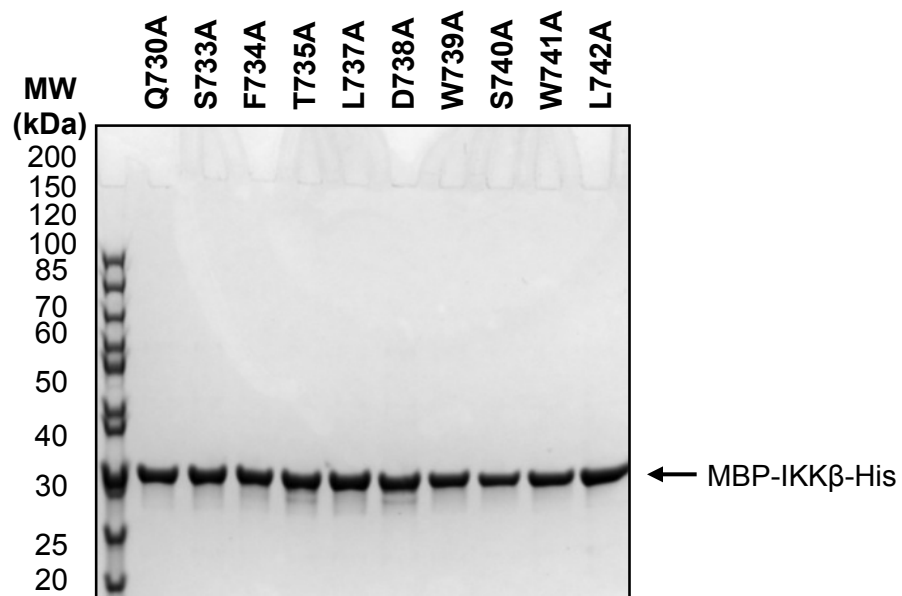

**Figure S2.** SDS-PAGE analysis of an arbitrary subset of the MBP-IKK $\beta$ -His mutant constructs used in these studies. Shown is a representative image showing the sample purity of the MBP-IKK $\beta$ -His constructs achieved using the expression and purification conditions discussed in the text. Samples were run under non-reducing conditions.

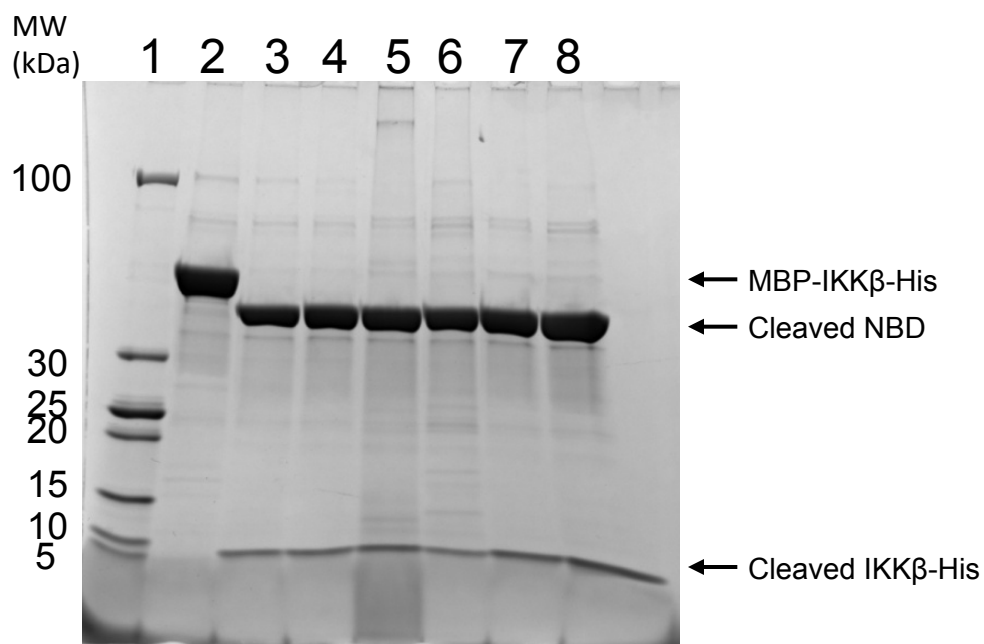

| Lane | Sample                          |
|------|---------------------------------|
| 1.   | Molecular weight markers        |
| 2.   | MBP-IKKβ-His(C716S) (uncleaved) |
| 3.   | C716S                           |
| 4.   | T735A                           |
| 5.   | L737A                           |
| 6.   | D738A                           |
| 7.   | S740A                           |
| 8.   | L742A                           |

} After treatment with Factor Xa

**Figure S3.** SDS-PAGE analysis of a subset of the MBP-IKKβ-His fusion constructs after cleavage with Factor Xa, showing that incubation for 1 h with 1 μg of Factor Xa can completely and cleanly cleave up to 10 mg of MBP-IKKβ-His fusion protein, as described in Materials and Methods. Samples were run under non-reducing conditions.

## Competition

```
[task]
  data = equilibria
  task = fit
[mechanism]
  L + N <=> N.L : KD1 dissociation ; L represents *IKKβ, N represents NEMO
  C + N <=> N.C : KD2 dissociation ; C represents competitor IKKβ mutant (IKKβC)
[concentrations]
  L = 15
  N = 15
[constants]
  KD1 = 3.6
  KD2 = 10 ?
[responses] : Specific molar response of *IKKβ
  N.L = 0.006 ?
[equilibria]
  variable C
  offset 0.05 : Value determined from control measurement in which no NEMO
                (N) was present. Defined in the text as AF.
  file ./rawdata.txt
[output]
  directory ./outputfit
[end]
```

**Figure S4.** DYNAFIT 4 code used to analyze inhibition data from the FA competition binding assay to determine the binding affinity ( $K_{D2}$ ) for NEMO of an unlabeled IKK $\beta$  competitor.

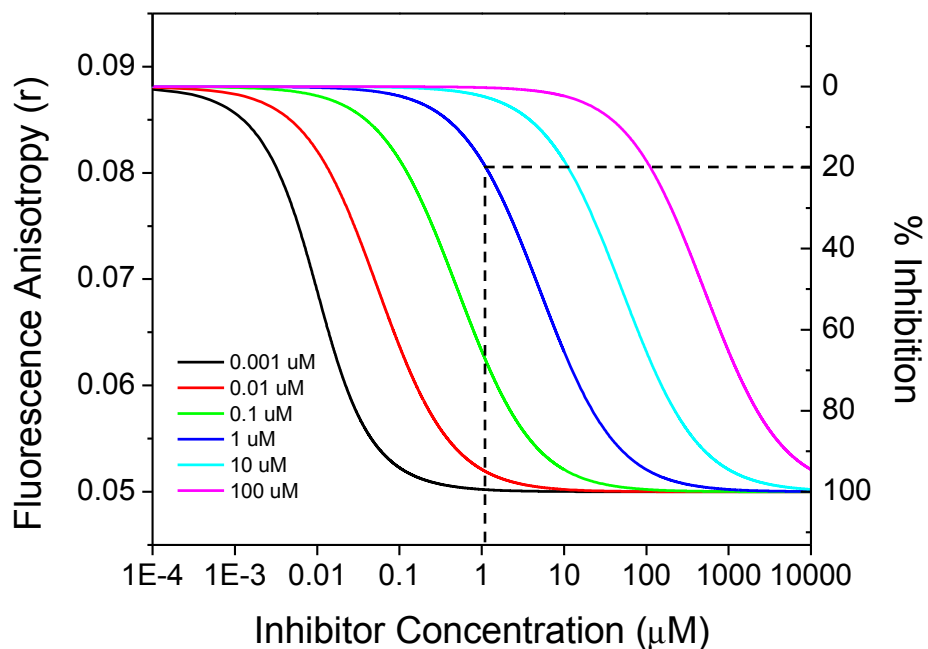

**Figure S5.** Simulated inhibition curves representing expected response from IKK $\beta$  competitors of varying affinities in the FA competitive binding assay. Curves were simulated assuming  $K_{D1} = 3.6$  nM, specific molar response = 0.006 mP per nM, minimum anisotropy  $A_F = 0.05$ , [FITC-IKK $\beta$ ] = 15 nM, and [NEMO] = 9 nM. Simulations are for IKK $\beta$  competitors with the following  $K_{D2}$  values: 1 nM, black line; 10 nM, red line; 100 nM, green line; 1000 nM, blue line; 10000 nM, cyan line; and 100000 nM, magenta line. Black dashed lines are included to show the relationship between % inhibition at a particular IKK $\beta$  competitor concentration and  $K_{D2}$ , as described in the text. All curves were simulated using a custom-written DYNAFIT 4 code (Figure S4).

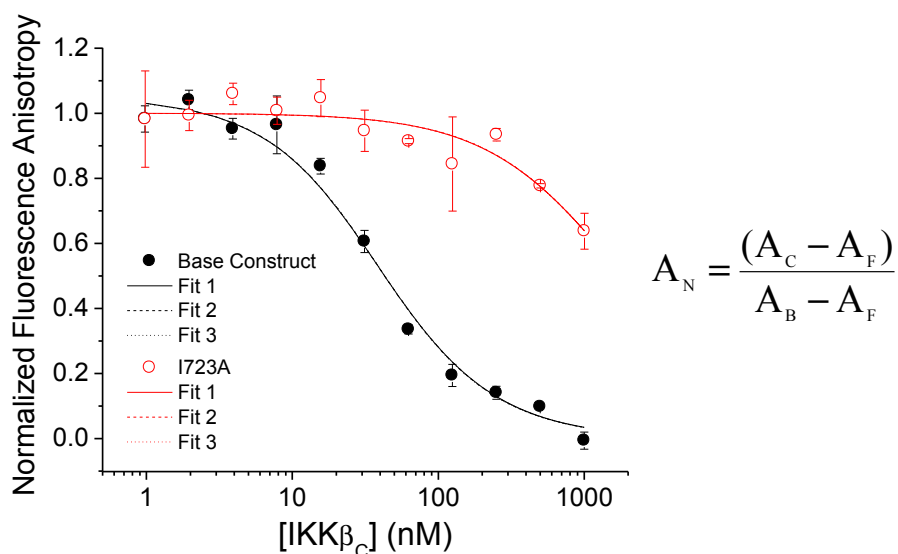

|                            | $K_{D2}$ (nM)  |       | $\Delta\Delta G$ (kcal/mol) |       |
|----------------------------|----------------|-------|-----------------------------|-------|
|                            | Base Construct | I723A | Base Construct              | I723A |
| Fit 1 ( $K_{D1} = 2.4$ nM) | 5.1            | 280   | 1.0                         | 3.3   |
| Fit 2 ( $K_{D1} = 3.6$ nM) | 6.7            | 370   | 1.1                         | 3.5   |
| Fit 3 ( $K_{D1} = 5.0$ nM) | 8.4            | 450   | 1.3                         | 3.6   |

**Figure S6.** Analysis of the robustness of fitted  $K_{D2}$  values obtained by analysis of data from the FA competition binding assay, with respect to error in the assumed value of  $K_{D1}$ . Plot shows experimental inhibition data for the base construct (closed circles) and IKK $\beta$  mutant I723A (open circles), along with best curve fits obtained using assumed  $K_{D1}$  values of 2.4 nM (Fit 1, solid lines), 3.6 nM (Fit 2, dashed lines) or 5.0 nM (Fit 3, dotted lines) for FITC-IKK $\beta$ . The solid, dotted, and dashed lines cannot be distinguished because they fall essentially on top of each other. All data were fitted using custom-written DYNAFIT 4 code (Figure S4), as described in the text. The table shows fitted  $K_{D2}$  values for the base construct and I723A mutant obtained by fitting with the different fixed values of  $K_{D1}$ , showing that the variation in the assumed value of  $K_{D1}$  results in a negligible change ( $<0.3$  kcal/mol) in the computed binding free energy ( $\Delta G = RT\ln(K_{D2})$ ) values and, due to cancelation of errors, causes no significant difference in the resulting  $\Delta\Delta G$  values.



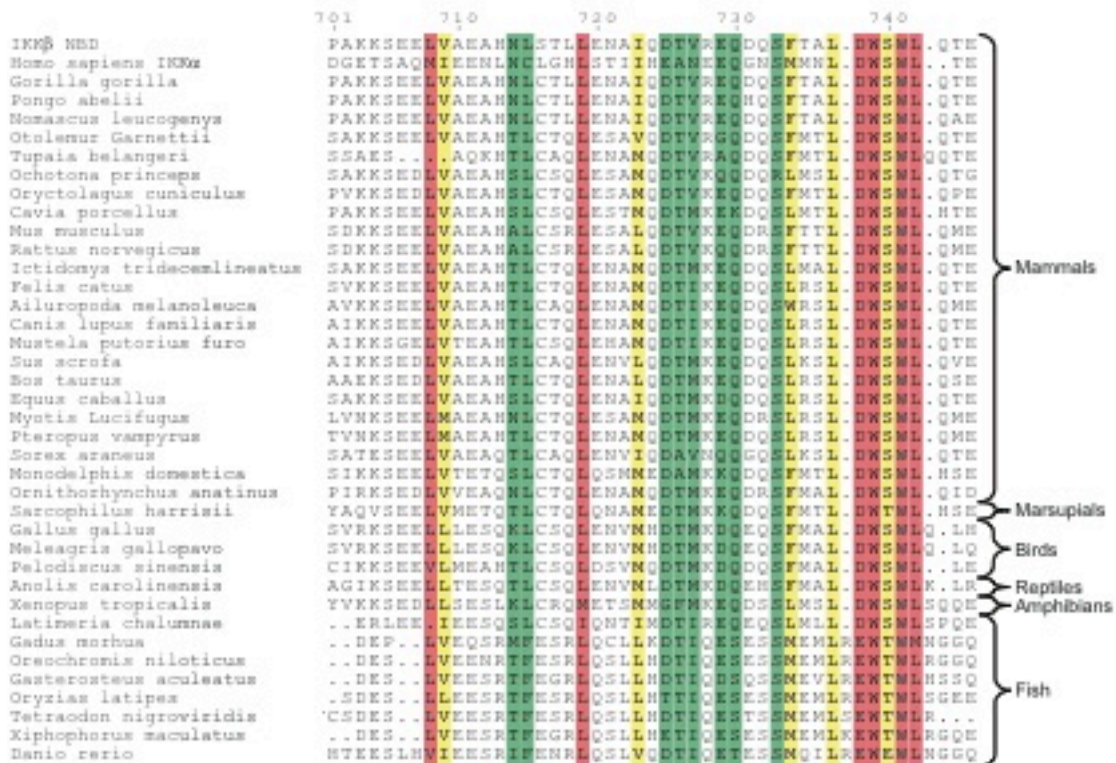

**Figure S7.** Sequence alignment of human IKKβ(701-745) with the corresponding region of human IKKα and with IKKβ ortholog sequences from the Ensembl Genome Browser (<http://useast.ensembl.org/index.html>). Sequences were aligned using the ClustalW2 tool with the default settings for each parameter, except for the multiple sequence alignment gap open parameter which was set to 5. All available ortholog sequences are included that (a) contain significant homology (<50% identity) with human IKKβ(701-745) and (b) contain the WxWL motif near the C-terminus.

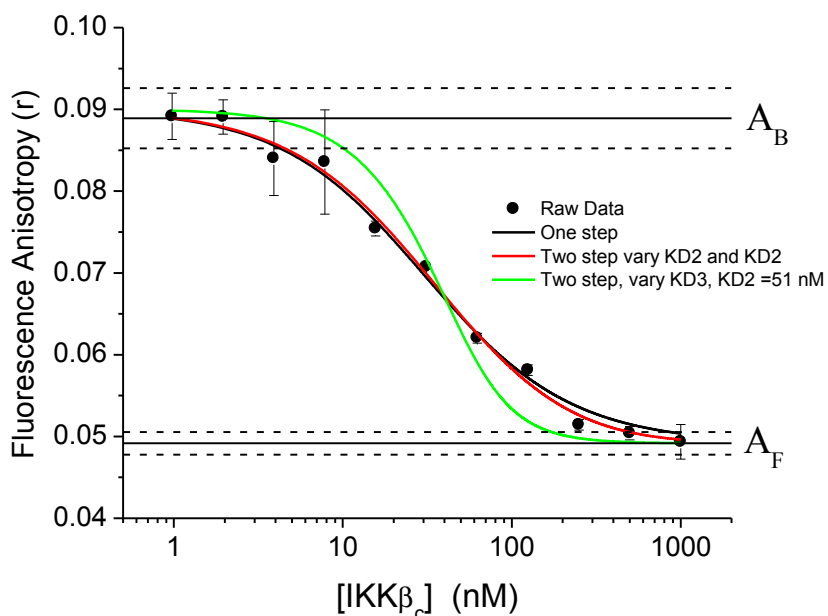

**Figure S8.** Comparison of single site and cooperative binding models as explanations for IKK $\beta$  inhibition binding data. The data points are from Figure 3C of the manuscript. The black curve shows the original fit to an independent site binding mechanism (Scheme 1 in the manuscript). The red curve shows the best fit to a cooperative binding model in which the first and second  $K_D$  values were allowed to vary unconstrained. This fit gave a best-fit value for  $K_{D2}$  of 505 nM, which in the form of the model we used indicates that this second step does not contribute significantly to the variation in signal observed over the competitor concentration range used. The green curve shows the best fit obtained if  $K_{D1}$  is set to a value 10-fold higher than the single-site value of 5.1 nM but  $K_{D2}$  is allowed to vary freely, showing that there is no value  $K_{D2}$  can adopt that gives a good fit to the data.

**Table S1. Density Overlap calculated from focused FTMap analysis of NEMO(44-111)**

| Mutant | FTMap Density Overlap<br>(# Probe Atoms) |
|--------|------------------------------------------|
| L708A  | 363                                      |
| V709A  | 206                                      |
| N714A  | 0                                        |
| L715A  | 446                                      |
| L719A  | 361                                      |
| I723A  | 0                                        |
| D725A  | -10                                      |
| T726A  | -28                                      |
| V727A  | 0                                        |
| E729A  | 0                                        |
| Q730A  | 0                                        |
| S733A  | 0                                        |
| F734A  | 270                                      |
| T735A  | -1                                       |
| L737A  | 167                                      |
| D738A  | 0                                        |
| W739A  | 511                                      |
| S740A  | 0                                        |
| W741A  | 386                                      |
| L742A  | 269                                      |

**Table S2. Complementary Oligonucleotide Primers used to Create the Base Construct by Site-Directed Mutagenesis of the MBP-IKK $\beta$ -His Construct<sup>a</sup>**

| Primer  | DNA Sequence                                             |
|---------|----------------------------------------------------------|
| C716S-s | GTGGCGGAAGCCCATAACCTG <u>GAG</u> CACCCTGCTGGAAAATGCAATTC |
| C716S-a | GAATTGCATTTTCCAGCAGGGTGCTCAGGTTATGGGCTTCCGCCAC           |

<sup>a</sup>Sequences are given in the 5' → 3' direction. The codon position of the serine mutation (C716S) is underlined for the sense (s) primer.

**Table S3. Complementary Oligonucleotide Primers used for Site-Directed Mutagenesis of the Base Construct<sup>a</sup>**

| Primer  | DNA Sequence                                                 |
|---------|--------------------------------------------------------------|
| L708A-s | CGGCGAAAAAATCTGAAGAAG <u>CG</u> GTGGCGGAAGCCCATAACCTG        |
| L708A-a | CAGGTTATGGGCTTCCGCCACCGCTTCTTCAGATTTTTTCGCCG                 |
| V709A-s | GCGAAAAAATCTGAAGAACTG <u>CG</u> CGGCGGAAGCCCATAACCTGAGC      |
| V709A-a | GCTCAGGTTATGGGCTTCCGCCGCCAGTTCTTCAGATTTTTTCGC                |
| N714A-s | CTGAAGAACTGGTGGCGGAAGCCCAT <u>GCG</u> CTGAGCACCTGCTGGAAAATGC |
| N714A-a | GCATTTTCCAGCAGGGTGCTCAGCGCATGGGCTTCCGCCACCAGTTCTTCAG         |
| L715A-s | CTGGTGGCGGAAGCCCATAAC <u>GCG</u> AGCACCTGCTGGAAAATGC         |
| L715A-a | GCATTTTCCAGCAGGGTGCTCGCGTTATGGGCTTCCGCCACCAG                 |
| L719A-s | GCCATAACCTGAGCACCTG <u>GCG</u> GAAAATGCAATTCAGGATACG         |
| L719A-a | CGTATCCTGAATTGCATTTTCCGCCAGGGTGCTCAGGTTATGGGC                |
| I723A-s | GCACCCTGCTGGAAAATGCAG <u>CGC</u> CAGGATACGGTTCGTGAACAG       |
| I723A-a | CTGTTACGAACCGTATCCTGCGCTGCATTTTCCAGCAGGGTG                   |
| D725A-s | CTGCTGGAAAATGCAATTCAG <u>GCG</u> ACGGTTCGTGAACAGGATCAG       |
| D725A-a | CTGATCCTGTTACGAACCGTGCCTGAATTGCATTTTCCAGCAG                  |
| T726A-s | GCTGGAAAATGCAATTCAGGAT <u>GCG</u> GTTTCGTGAACAGGATCAGAGC     |
| T726A-a | GCTCTGATCCTGTTACGAACCGCATCCTGAATTGCATTTTCCAGC                |
| V727A-s | GGAAAATGCAATTCAGGATAC <u>GCG</u> CGTGAACAGGATCAGAGCTTTACCG   |
| V727A-a | CGGTAAGCTCTGATCCTGTTACGCGCCGTATCCTGAATTGCATTTTCC             |
| E729A-s | GCAATTCAGGATACGGTTCGT <u>GCG</u> CAGGATCAGAGCTTTACCGC        |
| E729A-a | GCGGTAAAGCTCTGATCCTGCGCACGAACCGTATCCTGAATTGC                 |
| Q730A-s | GCAATTCAGGATACGGTTCGTGA <u>GCG</u> GATCAGAGCTTTACCGCGCTGG    |
| Q730A-a | CCAGCGCGGTAAAGCTCTGATCCGCTTACGAACCGTATCCTGAATTGC             |
| S733A-s | CGGTTTCGTGAACAGGATCAG <u>GCG</u> TTTACCGCGCTGGATTGGTCTTGG    |
| S733A-a | CCAAGACCAATCCAGCGCGGTAAACGCCTGATCCTGTTACGAACCG               |
| F734A-s | GGTTCGTGAACAGGATCAGAGC <u>GCG</u> ACCGCGCTGGATTGGTCTTGG      |
| F734A-a | CCAAGACCAATCCAGCGCGGTGCGCTCTGATCCTGTTACGAACC                 |
| T735A-s | GTGAACAGGATCAGAGCTTT <u>GCG</u> GCGCTGGATTGGTCTTGGCTG        |
| T735A-a | CAGCCAAGACCAATCCAGCGCCGCAAAGCTCTGATCCTGTTAC                  |
| L737A-s | GAACAGGATCAGAGCTTTACCGCG <u>GCG</u> GATTGGTCTTGGCTGCAGACG    |
| L737A-a | CGTCTGCAGCCAAGACCAATCCGCCGCGGTAAAGCTCTGATCCTGTT              |
| D738A-s | GATCAGAGCTTTACCGCGCTG <u>GCG</u> TGGTCTTGGCTGCAGACGGAAG      |
| D738A-a | CTTCCGTCTGCAGCCAAGACCACGCCAGCGCGGTAAAGCTCTGATC               |
| W739A-s | GATCAGAGCTTTACCGCGCTGGAT <u>GCG</u> TCTTGGCTGCAGACGGAAGG     |
| W739A-a | CCTCCGTCTGCAGCCAAGACGCATCCAGCGCGGTAAAGCTCTGATC               |
| S740A-s | GCTTTACCGCGCTGGATTGG <u>GCG</u> TGGCTGCAGACGGAAGGAGG         |
| S740A-a | CCTCCTTCCGTCTGCAGCCACGCCCAATCCAGCGCGGTAAAGC                  |
| W741A-s | GCTTTACCGCGCTGGATTGGTCT <u>GCG</u> CTGCAGACGGAAGGAGGTGG      |
| W741A-a | CCACCTCCTTCCGTCTGCAGCGCAGACCAATCCAGCGCGGTAAAGC               |
| L742A-s | CCGCGCTGGATTGGTCTTGG <u>GCG</u> CAGACGGAAGGAGGTGGAGG         |
| L742A-a | CCTCCACCTCCTTCCGTCTGCGCCCAAGACCAATCCAGCGCGG                  |

<sup>a</sup>Sequences are given in the 5'→3' direction. The codon position of each mutation is underlined for the sense (s) primer.

| <b>Table S4. IKK<math>\beta</math> Peptides Used in Fluorescence Anisotropy Studies</b> |                                                                         |
|-----------------------------------------------------------------------------------------|-------------------------------------------------------------------------|
| Peptide                                                                                 | Sequence                                                                |
| IKK $\beta$ (701-745)                                                                   | PAKKSEELVAEAHNL <u>C</u> TLLENAIQDTVREQDQSFTALDWSWLQTE                  |
| FITC-IKK $\beta$                                                                        | FITC-Ahx-PAKKSEELVAEAHNLCTLLENAIQDTVREQDQSFTALD<br>WSWLQTE <sup>a</sup> |

<sup>a</sup>Ahx = 6-aminohexanoic acid

## REFERENCES

1. May, M. J., Marienfeld, R. B., and Ghosh, S. (2002) Characterization of the I $\kappa$ B-kinase NEMO Binding Domain, *J. Biol. Chem.* 277, 45992-46000.
2. (2) May, M. J., D'Acquisto, F., Madge, L. A., Glockner, J., Pober, J. S., and Ghosh, S. (2000) Selective Inhibition of NF- $\kappa$ B Activation by a Peptide That Blocks the Interaction of NEMO with the I $\kappa$ B Kinase Complex, *Science* 289, 1550-1554.
3. Rushe, M., Silvian, L., Bixler, S., Chen, L. L., Cheung, A., Bowes, S., Cuervo, H., Berkowitz, S., Zheng, T., Guckian, K., Pellegrini, M., and Lugovskoy, A. (2008) Structure of a NEMO/IKK-Associating Domain Reveals Architecture of the Interaction Site, *Structure* 16, 798-808.
4. Lo, Y. C., Maddineni, U., Chung, J. Y., Rich, R. L., Myszka, D. G., and Wu, H. (2008) High-affinity interaction between IKK beta and NEMO, *Biochemistry* 47, 3109-3116.
5. Baima, E. T., Guzova, J. A., Mathialagan, S., Nagiec, E. E., Hardy, M. M., Song, L. R., Bonar, S. L., Weinberg, R. A., Selness, S. R., Woodard, S. S., Chrencik, J., Hood, W. F., Schindler, J. F., Kishore, N., and Mbalaviele, G. (2010) Novel Insights into the Cellular Mechanisms of the Anti-inflammatory Effects of NF- $\kappa$ B Essential Modulator Binding Domain Peptides, *J. Biol. Chem.* 285, 13498-13506.
6. Shaun M. Cote, Mary S. Golden., Thomas D. Gilmore, Kimberley Glover, Melanie Herscovitch, Thomas Ennis, Adrian Whitty, Mutation of Non-Essential Cysteines Shows that NF- $\kappa$ B Essential Modulator (NEMO) Forms a Constitutive Noncovalent Dimer that Binds I $\kappa$ B Kinase- $\beta$  (IKK $\beta$ ) with High Affinity (Submitted)
7. Strnad, J., McDonnell, P. A., Riexinger, D. J., Mapelli, C., Cheng, L., Gray, H., Ryseck, R. P., and Burke, J. R. (2006) NEMO binding domain of IKK-2 encompasses amino acids 735–745, *J. Mol. Recognit.* 19, 227-233.
